# Supplementary material for: A New Strategy for Discovering Structurally Clear Plant Biostimulants
Source: Preprints.org preprint supplement (doi:10.20944/preprints202311.1000.v1), 2023-11-15
Supplement: Supplementary file 2 [file Supplementary File 1.xlsx]

## Sheet: S1 Intestinal compounds
More compounds in the midgut	More compounds in the hindgut
2, 6-diaminopimelic acid	Olein glyceride
2-aminoadipic acid	2-aminobutyric acid
2-hydroxyglutaric acid	3-hydroxybenzoic acid
2-hydroxypyridine	3-hydroxyphenylpropionic acid
3-hydroxybutyric acid	Phenylpropionic acid
4-aminobutyric acid	4-hydroxyphenylacetic acid
4-hydroxybenzoic acid	4-hydroxyphenylpropionic acid
5-methyluridine	4-hydroxypyridine
Adenosine	5-amino-valeric acid
5'- adenosine monophosphate	Alanine
Allantoin	Lactose
Alpha-ketoglutaric acid	Arabinose
Alpha tocopherol	Benzoic acid
Aminomalonic acid	Catechol
Arabitol	Citric acid
Arabic acid	Eicosanol
Arachidic acid	Dextrose 6-phosphate
Asparagine	Hexadecanol
Aspartic acid	Homoserine
Azelaic acid	Hydroquinone
Beta-alanine	Inosine
Beta-glutsterol	Meliobiose
Canola sterol	Methyl 11-octadecenoate
Cholesterol	Methyl linoleate
Cysteine	Methyl stearate
Erythritol	Methyl pentadecanoate
Ferulic acid	Methyl phosphate
Fumaric acid	Myristic acid
Gamma-aminobutyric acid	N-acetyl-l-glutamic acid
Glucose	N-butylamine
Glucuronic acid	O-acetylserine
Glutamic acid	Stearyl alcohol
Glutamine	O-phosphoethanolamine
Glyceric acid	Palmitic acid
Glycerin	Phenylacetic acid
Glycolic acid	Piperic acid
Guanosine	Pyruvic acid
Heptadecanoic acid	Ribose
Caproic acid	Xylose
Histidine	Pantothenic acid
Homocysteine	Pelargonic acid
Isobutylamine	Pentadecanoic acid
Isoleucine	Proline
Lactic acid	Trehalose
Lanthionine	Lysine
Lauric acid	Glycine
Leucine
Linoleic acid
Lysine
Malic acid
Mannitol
Methionine
Methionine sulfoxide
Inositol
N-acetyl-D-glucosamine
N-acetyl-l-aspartic acid
Oleic acid
Ornithine
Oxalic acid
Palmitoleic acid
P-coumaric acid
Phenylalanine
Phosphoric acid
Putrescine
Pyroglutamic acid
Quinic acid
Sarcosine
Serine
Succinic acid
Threonic acid
Tryptophan
Tyrosine
Urea
Uric acid
Uridine 5' -monophosphate
Valine
Vanillic acid
Phytol
Proline
Ribonic acid
Stearic acid
Stigmasterol
4-hydroxyphenylpyruvate
Uracil
Levulose
Glycine
Maltose
